# Supplementary material for: Effects of spin–phonon coupling on two-dimensional ferromagnetic semiconductors: a case study of iron and ruthenium trihalides
Source: Royal Society of Chemistry journal article supplement (doi:10.1039/d0nr08626f), 2021-01-01
Supplement: d0nr08626f1.pdf [file d0nr08626f1.pdf]

## Supplementary Information

### **Effects of spin-phonon coupling on two-dimensional ferromagnetic semiconductors: a case study of iron and ruthenium trihalides**

Yinqiao Liu<sup>1</sup>, Qinxi Liu<sup>1</sup>, Ying Liu<sup>1</sup>, Xue Jiang<sup>1,\*</sup>, Xiaoliang Zhang<sup>2</sup>, Jijun Zhao<sup>1</sup>

*<sup>1</sup>Key Laboratory of Material Modification by Laser, Ion and Electron Beams (Dalian University of Technology), Ministry of Education, Dalian 116024, China*

*<sup>2</sup>Key Laboratory of Ocean Energy Utilization and Energy Conservation of Ministry of Education, School of Energy and Power Engineering, Dalian University of Technology, Dalian 116024, China.*

---

\*Corresponding author. E-mail: [jiangx@dlut.edu.cn](mailto:jiangx@dlut.edu.cn) (Xue Jiang)

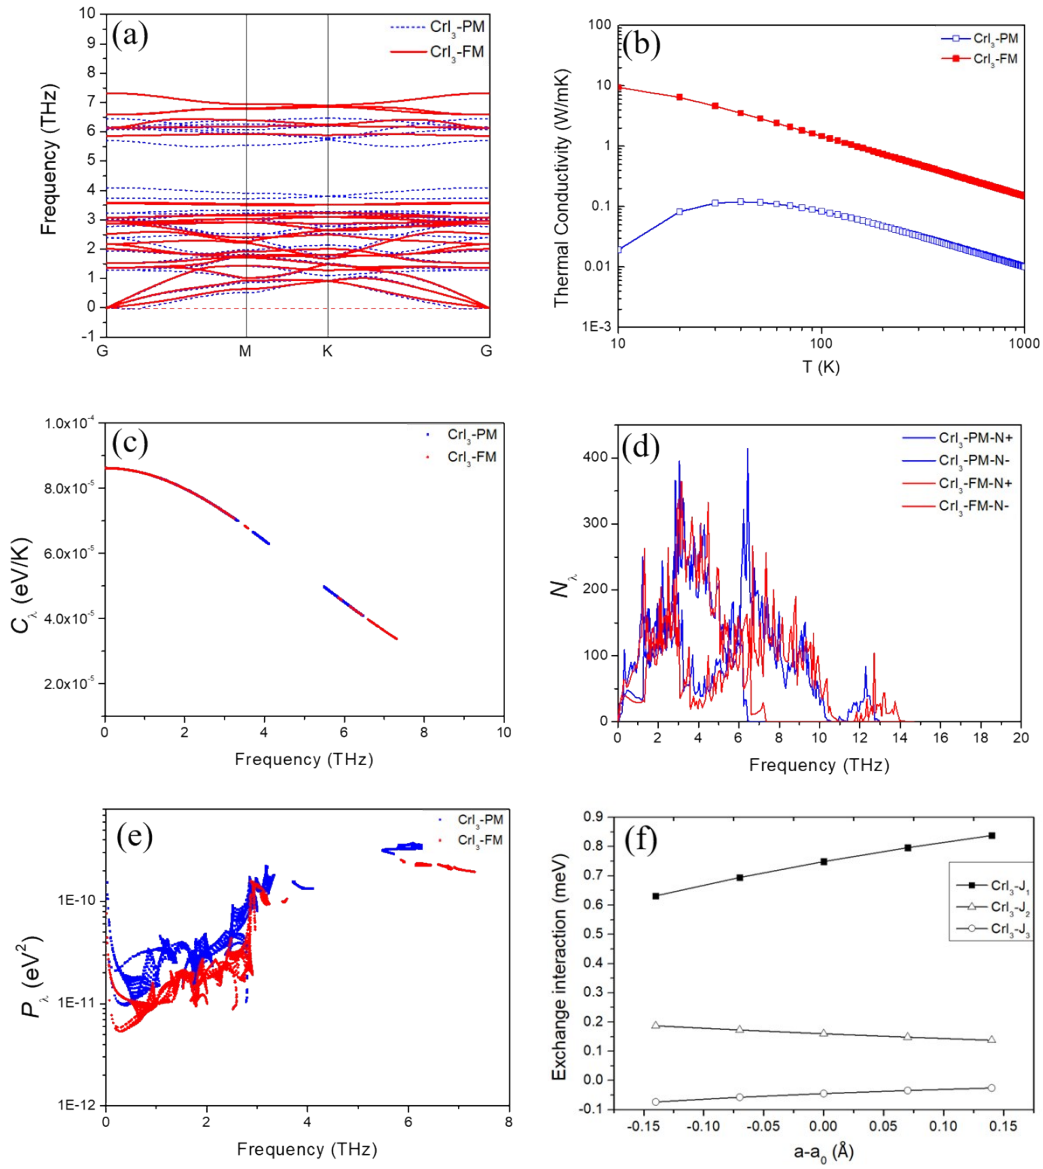

**FIGURE S1.** Effects of SPC on various phonon-related properties of monolayer  $\text{CrI}_3$ : (a) phonon dispersion curve; (b) lattice thermal conductivity; (c) mode dependent heat capacity; (d) scattering possibility; (e) phonon interaction strength; and (f) dependence of magnetic-exchange interaction parameters on lattice constant.

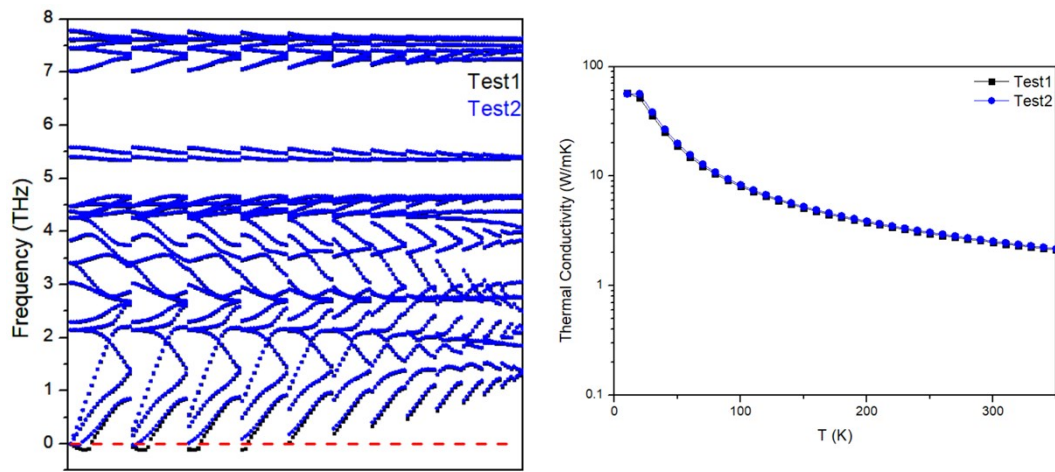

**FIGURE S2.** (Left) Phonon dispersion data of full reciprocal space. The small imaginary frequency of PM-FeBr<sub>3</sub> will disappear by enlarge the size of the supercell, e.g. from test1 to test2. (Right) Small imaginary frequency nearly unchanged the lattice thermal conductivity of PM-FeBr<sub>3</sub>.

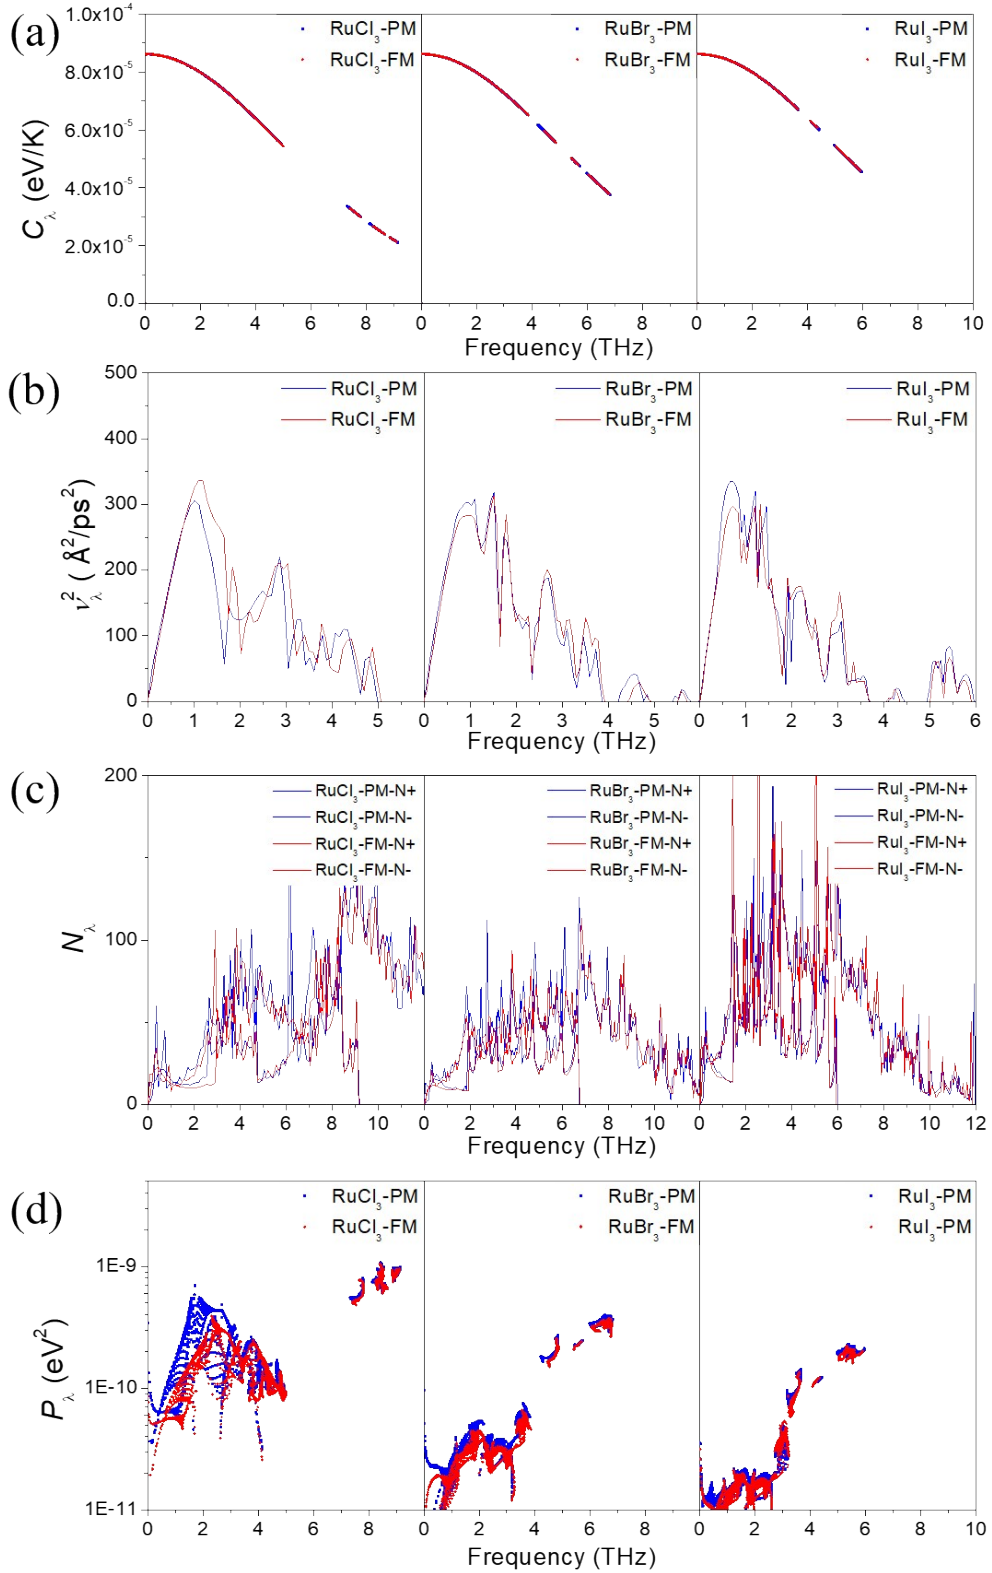

**FIGURE S3.** Effects of SPC on (a) mode dependent heat capacity, (b) production of group velocities, (c) scattering possibility, and (d) average phonon–phonon interaction strength for RuCl<sub>3</sub>, RuBr<sub>3</sub>, and RuI<sub>3</sub>, respectively.

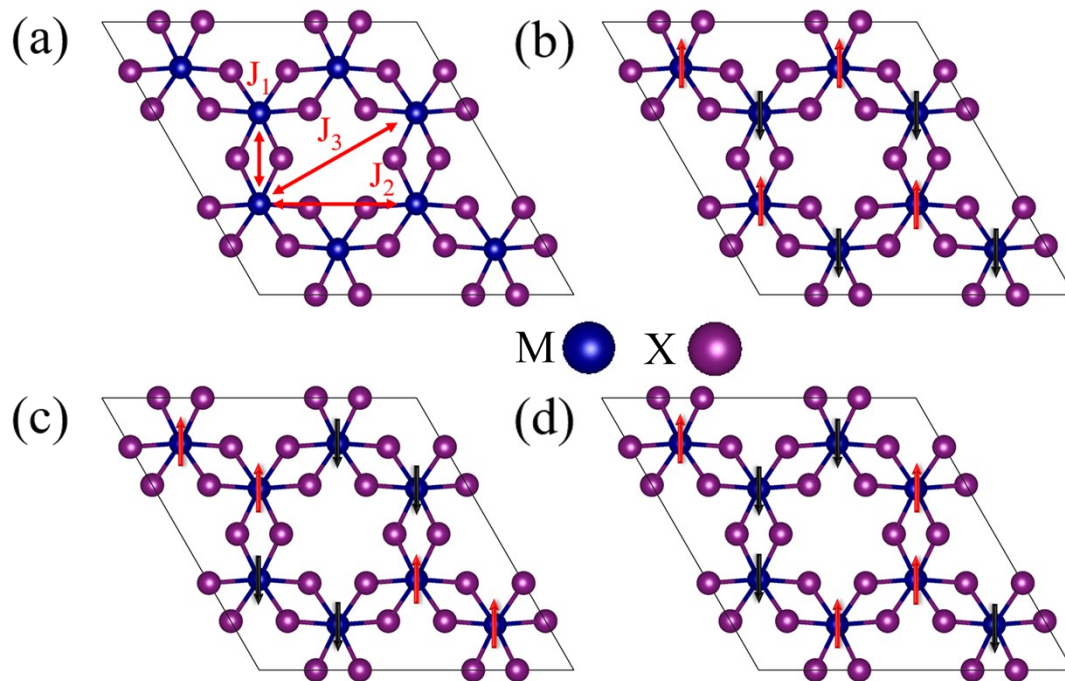

**FIGURE S4.** (a) Top view of MX<sub>3</sub> monolayers. Considered exchange paths are shown by red double arrows. Possible antiferromagnetic (AFM) magnetic configurations of MX<sub>3</sub> monolayers with: (b) Néel-AFM, (c) stripy-AFM, and (d) zigzag-AFM orderings.

**FIGURE S5.** Curie temperatures with or without lattice deformation, C is heat capacity.

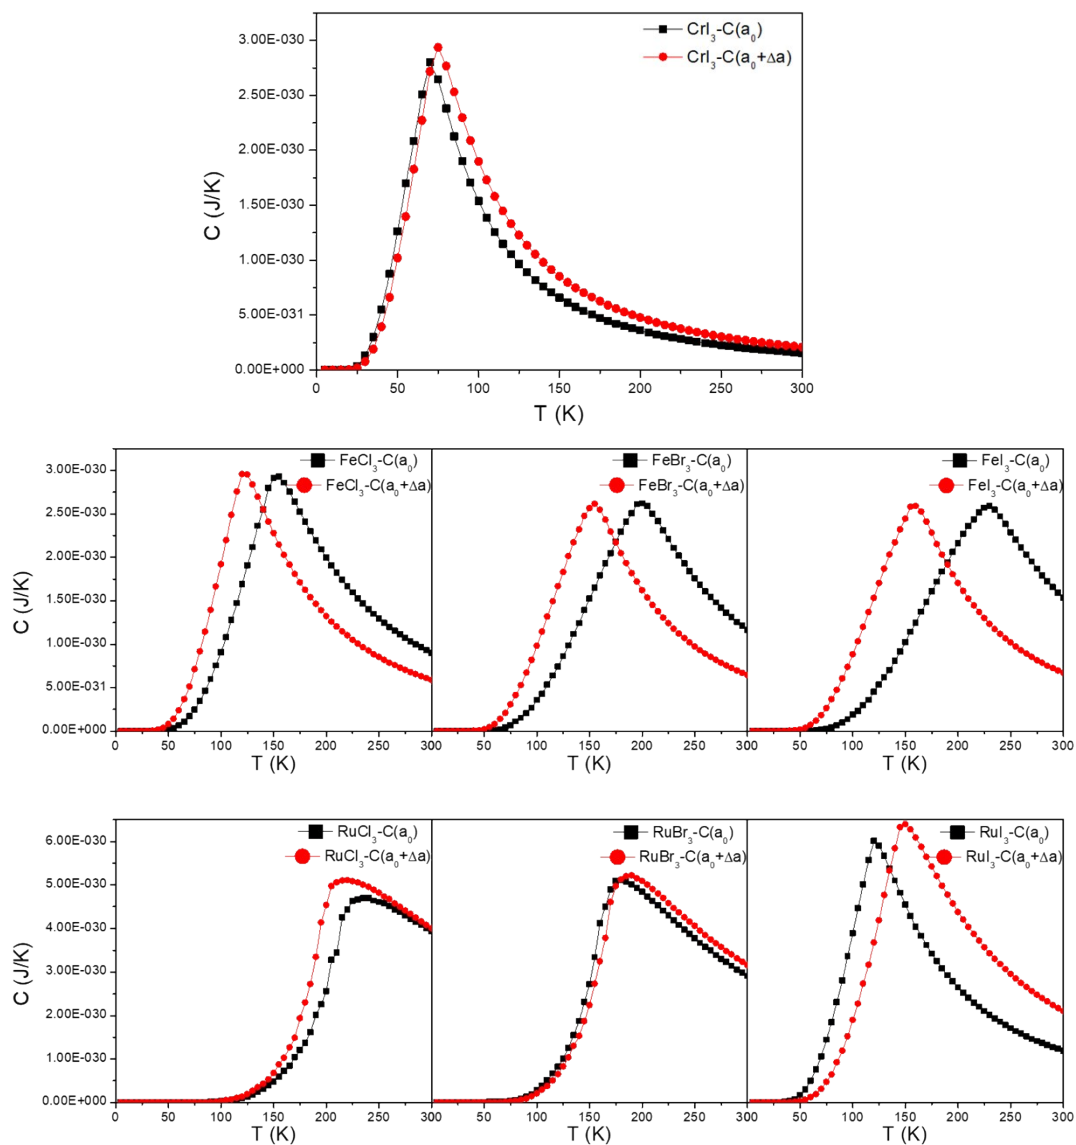

**TABLE S1.** The difference in the total energy per unit cell between the FM, PM states ( $E_{\text{FM}}-E_{\text{PM}}$ ) or FM, antiferromagnetic (AFM) states ( $E_{\text{AFM}}-E_{\text{FM}}$ ), respectively.

|                                        | FeCl <sub>3</sub> | FeBr <sub>3</sub> | FeI <sub>3</sub> | RuCl <sub>3</sub> | RuBr <sub>3</sub> | RuI <sub>3</sub> | CrI <sub>3</sub> | VCl <sub>3</sub> | VBr <sub>3</sub> | VI <sub>3</sub> |
|----------------------------------------|-------------------|-------------------|------------------|-------------------|-------------------|------------------|------------------|------------------|------------------|-----------------|
| $E_{\text{FM}}-E_{\text{PM}}$<br>[eV]  | -1.064            | -1.024            | -0.543           | -0.195            | -0.136            | -0.045           | -3.374           | -1.265           | -1.406           | -1.509          |
| $E_{\text{AFM}}-E_{\text{FM}}$<br>[eV] | -0.073            | -0.058            | -0.061           | 0.199             | 0.153             | 0.069            | 0.037            | —                | —                | —               |

**TABLE S2.** The total energy per unit cell of AFM states.

| Energy [eV]             | FM      | Néel-AFM | stripy-AFM | zigzag-AFM |
|-------------------------|---------|----------|------------|------------|
| <b>CrI<sub>3</sub></b>  | -31.838 | -31.802  | -31.801    | -31.816    |
| <b>FeBr<sub>3</sub></b> | -29.906 | -29.965  | -29.971    | -29.964    |
| <b>FeCl<sub>3</sub></b> | -33.289 | -33.363  | -33.359    | -33.338    |
| <b>FeI<sub>3</sub></b>  | -26.576 | -26.637  | -26.672    | -26.666    |
| <b>RuBr<sub>3</sub></b> | -30.500 | -30.347  | -30.409    | -30.449    |
| <b>RuCl<sub>3</sub></b> | -33.525 | -33.326  | -33.400    | -33.435    |
| <b>RuI<sub>3</sub></b>  | -28.196 | -28.127  | -28.136    | -28.162    |



**TABLE S3.** Magnetic moment  $M$  and exchange parameters  $J$  (in meV).

|                         | $M$ [ $\mu\text{B}$ ] | $J_1$  | $J_2$  | $J_3$   | $M(\text{strain}=10\%)$ | $J_1(\text{strain}=10\%)$ | $J_2(\text{strain}=10\%)$ | $J_3(\text{strain}=10\%)$ |
|-------------------------|-----------------------|--------|--------|---------|-------------------------|---------------------------|---------------------------|---------------------------|
| <b>CrI<sub>3</sub></b>  | 3.02                  | 0.590  | 0.080  | 0.213   | 3.05                    | 0.692                     | 0.053                     | 0.178                     |
| <b>FeBr<sub>3</sub></b> | 3.72                  | -0.913 | 0.212  | -0.130  | 3.74                    | -0.696                    | 0.163                     | -0.107                    |
| <b>FeCl<sub>3</sub></b> | 3.80                  | -0.916 | 0.069  | -0.141  | 3.82                    | -0.742                    | 0.049                     | -0.116                    |
| <b>FeI<sub>3</sub></b>  | 3.56                  | -1.091 | 0.285  | -0.404  | 3.58                    | -0.756                    | 0.193                     | -0.342                    |
| <b>RuBr<sub>3</sub></b> | 0.73                  | 52.648 | -5.263 | -5.341  | 0.75                    | 54.326                    | -5.727                    | -5.156                    |
| <b>RuCl<sub>3</sub></b> | 0.82                  | 61.396 | -7.271 | -11.736 | 0.82                    | 62.859                    | -8.427                    | -12.306                   |
| <b>RuI<sub>3</sub></b>  | 0.67                  | 23.928 | 1.489  | 4.541   | 0.69                    | 31.742                    | 0.467                     | 3.450                     |
